# Supplementary material
Source: Research Square preprint supplement (doi:10.21203/rs.3.rs-9772372/v1)
Supplement: Supplementary file 1 [file 62ae92285975da425e13f086.xlsx]

## Sheet: BoHV4 MOI finding
	DH82 12hpi	DH82 24hpi	DH82 48hpi	DH82 72hpi	DH82 96hpi	D17 12hpi	D17 24hpi	D17 48hpi	D17 72hpi	D17 96hpi	OSA2 12hpi	OSA2 24hpi	OSA2 48hpi	OSA2 72hpi	OSA2 96hpi	FDOG 12hpi	FDOG 24hpi	FDOG 48hpi	FDOG 72hpi	FDOG 96hpi
0,1 MOI	0.00276243	0.0884514	0.070426	0.0822425	0.118631	0	0.0329761	0.0406691	0.0419032	0.0669456	0	0	0.0143763	0.00885515	0.0172005	0	0	0.00449871	0.00709723	0.0107296
0,5 MOI	0.0254669	0.272008	0.209277	0.192945	0.256689	0	0.0758693	0.147292	0.145395	0.18869	0	0.0672888	0.057928	0.0580816	0.062753	0	0.00786211	0.0165054	0.0342936	0.0218023
1 MOI	0.0475733	0.279482	0.353455	0.374381	0.489823	0.0372439	0.124462	0.205451	0.23311	0.255444	0	0.0849741	0.0916461	0.0797305	0.169692	0	0.0225	0.0570934	0.0382436	0.068323
2 MOI	0.104722	0.466667	0.464715	0.361955	0.555414	0.0474595	0.134653	0.334583	0.343414	0.310878	0.00843882	0.180887	0.159624	0.188901	0.377049	0	0.0857275	0.0816817	0.223642	0.21406
4 MOI	0.102412	0.325221	0.499124	0.452822	0.62436	0.0757193	0.162716	0.425345	0.404651	0.41879	0.0137232	0.193459	0.237506	0.209158	0.310185	0.0257009	0.229708	0.162879	0.423963	0.391589

## Sheet: BoHV1 MOI finding
	DH82 12hpi	DH82 24hpi	DH82 48hpi	DH82 72hpi	DH82 96hpi	D17 12hpi	D17 24hpi	D17 48hpi	D17 72hpi	D17 96hpi	OSA2 12hpi	OSA2 24hpi	OSA2 48hpi	OSA2 72hpi	OSA2 96hpi	FDOG 12hpi	FDOG 24hpi	FDOG 48hpi	FDOG 72hpi	FDOG 96hpi
0,01 MOI	0	0	0.002	0.004	0.0015	0	0.0015	0.0055	0.0016	0.0023	0.0105	0.0084	0.0074	0.0057	0.0276	0	0.0092	0.0093	0.0243	0.0255
0,05 MOI	0	0.0012	0.0017	0.0028	0.0014	0.0009	0.0024	0.0013	0.0019	0.0023	0.0145	0.0191	0.0065	0.047	0.0221	0	0.0073	0.0106	0.0151	0.0231
0,1 MOI	0	0.0024	0.0016	0.0034	0.0013	0.0011	0.0019	0.0033	0.0016	0.0028	0.0104	0.0064	0.0134	0.047	0.0143	0	0.0115	0.0167	0.0275	0.0302
0,5 MOI	0	0.0024	0.0013	0.0023	0.0012	0.0011	0.0066	0.0012	0.0062	0.0017	0.0163	0.009	0.0065	0.0223	0.0299	0	0.0068	0.0079	0.0152	0.0391
1 MOI	0.0009	0.0029	0.0032	0.0027	0.002	0.0026	0.0075	0.0066	0.0054	0.0023	0.0176	0.0132	0.0123	0.0278	0.0129	0	0.0089	0.0111	0.0301	0.0303

## Sheet: BoHV4 FLOW
	DH82 CTR	DH82 CTR	DH82 CTR	DH82 BoHV4	DH82 BoHV4	DH82 BoHV4	D17 CTR	D17 CTR	D17 CTR	D17 BoHV4	D17 BoHV4	D17 BoHV4	OSA2 CTR	OSA2 CTR	OSA2 CTR	OSA2 BoHV4	OSA2 BoHV4	OSA2 BoHV4	FDOG CTR	FDOG CTR	FDOG CTR	FDOG BoHV4	FDOG BoHV4	FDOG BoHV4
INFECTED 48h (GFP+)	0	0	0	97.7	98.6	98.8	0	0	0	64.1	62.1	57.5	0	0	0	57.6	57.4	58	0	0	0	26.5	29.4	28.3
DEAD 48h (7AAD+)	4.9	6	6	5.2	8.6	4.9	1.4	1.4	1.5	1.6	1.1	1.6	0.3	0.4	0.3	0.3	0.3	1.3	6.7	7.6	7.4	5	4.9	4.6
INFECTED 96h (GFP+)	0	0	0	94.1	93.7	93	0	0	0	97.3	96.8	97.6	0	0	0	98.7	99	99	0	0	0	21.7	20.9	22.5
DEAD 96h (7AAD+)	2.4	0.7	1.2	36.9	43.1	36.5	7.7	6.8	4.7	12.3	10.1	9.7	1.8	1.6	2.3	31.5	30.1	31.2	2.1	1.6	1.6	1.6	1.7	1.9

## Sheet: BoHV1 FLOW
	DH82 CTR	DH82 CTR	DH82 CTR	DH82 BoHV4	DH82 BoHV4	DH82 BoHV4	D17 CTR	D17 CTR	D17 CTR	D17 BoHV4	D17 BoHV4	D17 BoHV4	OSA2 CTR	OSA2 CTR	OSA2 CTR	OSA2 BoHV4	OSA2 BoHV4	OSA2 BoHV4	FDOG CTR	FDOG CTR	FDOG CTR	FDOG BoHV4	FDOG BoHV4	FDOG BoHV4
INFECTED 48h (gD+)	0	0	0	0.11	0.17	0.14	0	0	0	1.1	0.98	0.84	0	0	0	5.58	5.23	7.18	0	0	0	2.69	1.49	2.88
DEAD 48h (7AAD+)	0.73	1.24	0.75	1.36	1.27	0.94	0.35	0.83	0.84	0.77	0.46	0.87	2.59	1.87	2.07	1.89	1.88	1.63	0.56	1.28	0.95	0.47	0.49	0.43
INFECTED 96h (gD+)	0	0	0	0.19	0.19	0.1	0	0	0	0.23	0.31	0.63	0	0	0	3.88	2.98	3.39	0	0	0	20.53	18.87	19.85
DEAD 96h (7AAD+)	0.96	0.73	1.01	1.13	0.84	1.07	2.07	1.81	2.21	1.43	1.97	1.7	14.09	26.68	23.59	22.88	22.85	22.63	0.29	0.27	0.33	1.21	1.01	1

## Sheet: IF cCAS3
	DH82 CTR	DH82 CTR	DH82 CTR	DH82 BoHV4	DH82 BoHV4	DH82 BoHV4	D17 CTR	D17 CTR	D17 CTR	D17 BoHV4	D17 BoHV4	D17 BoHV4	OSA2 CTR	OSA2 CTR	OSA2 CTR	OSA2 BoHV4	OSA2 BoHV4	OSA2 BoHV4	FDOG CTR	FDOG CTR	FDOG CTR	FDOG BoHV4	FDOG BoHV4	FDOG BoHV4
Ccas3+ 48h	0	0.0037807	0.00218871	0.0071	0.0093	0.0117	0.0187	0.0092	0.0091	0.0227	0.011	0.0214	0.0099	0.0192	0.0144	0.0128	0.0267	0.0227	0.0143	0.0322	0.013	0.0152	0.0144	0.0133
Ccas3+ 96h	0.00401487	0.00654084	0.00438989	0.0045	0.0153	0.0055	0.0324	0.0204	0.0163	0.0339	0.0277	0.0674	0.0099	0.031	0.0137	0.0409	0.0546	0.0923	0.0319	0.0319	0.0174	0.08	0.0457	0.0864

## Sheet: IF GSDM-D
	DH82 CTR	DH82 CTR	DH82 CTR	DH82 BoHV4	DH82 BoHV4	DH82 BoHV4	D17 CTR	D17 CTR	D17 CTR	D17 BoHV4	D17 BoHV4	D17 BoHV4	OSA2 CTR	OSA2 CTR	OSA2 CTR	OSA2 BoHV4	OSA2 BoHV4	OSA2 BoHV4	FDOG CTR	FDOG CTR	FDOG CTR	FDOG BoHV4	FDOG BoHV4	FDOG BoHV4
GSDM-D 48h	0	0	0	0.0181	0.017	0.0174	0	0	0	0.0041	0.0051	0.003	0.0296	0.0224	0.0265	0.0423	0.0278	0.0272	0.0297	0.0193	0.0392	0.016	0.0213	0.0214
GSDM-D 96h	0	0	0	0.0005	0	0	0.0041	0.0046	0	0.0141	0.015	0.1931	0.0293	0.0268	0.059	0.0971	0.395	0.0892	0.0652	0.0797	0.0523	0.0792	0.0461	0.0394

## Sheet: BoHV4 SCRATCH ASSAY
	DH82 CTR	DH82 CTR	DH82 CTR	DH82 BoHV4	DH82 BoHV4	DH82 BoHV4	D17 CTR	D17 CTR	D17 CTR	D17 BoHV4	D17 BoHV4	D17 BoHV4	OSA2 CTR	OSA2 CTR	OSA2 CTR	OSA2 BoHV4	OSA2 BoHV4	OSA2 BoHV4
T0	0	0	0	0	0	0	0	0	0	0	0	0	0	0	0	0	0	0
T6	6.1	14.2	19.8	24.5	5.6	1.7	14.9	35.6	35.8	15.1	52.6	27.9	41.5292	16.0156	17.2519	23.1557	46.2176	40.824
T24	35.6	36.9	33.2	13.4	0	1.4	54.1	58.3	61.5	16.1	60.6	8.6	43.3283	47.4609	59.542	37.0902	49.9482	45.568
T36	44.22	41.54	42.3	17.39	36.32	43.41	55.6054	83.2	81.48	22.6	52.94	28.28	52.3238	50.7812	71.9389	32.98	66.943	48.5643
T48	61.55	65	62.07	17.95	41.93	0	89.96	100	100	38.26	64.43	37.5	84.2579	79.8828	91.084	80.123	81.5544	74.1573

## Sheet: BoHV1 SCRATCH ASSAY 
	DH82 CTR	DH82 CTR	DH82 CTR	DH82 BoHV1	DH82 BoHV1	DH82 BoHV1	D17 CTR	D17 CTR	D17 CTR	D17 BoHV1	D17 BoHV1	D17 BoHV1	OSA2 CTR	OSA2 CTR	OSA2 CTR	OSA2 BoHV1	OSA2 BoHV1	OSA2 BoHV1
T0	0	0	0	0	0	0	0	0	0	0	0	0	0	0	0	0	0	0
T6	6.1	14.2	19.8	0	0	9.7	14.9	35.6	35.8	13.9	5.4	9	41.5292	16.0156	17.2519	29.0373	19.4743	24.6495
T24	35.6	36.9	33.2	0	6.1	9.7	54.1	58.3	61.5	18.6	8.1	10.9	43.3283	47.4609	59.542	49.8447	24.9701	42.5234
T36	44.22	41.54	42.3	48.33	59.93	41.94	55.6054	83.2	81.48	32.98	18.33	41.9355	52.3238	50.7812	71.9389	40.3727	37.5149	52.8037
T48	61.55	65	62.07	35.42	43.4	49.6	89.96	100	100	70.28	94.82	48.74	84.2579	79.8828	91.084	51.8634	68.6977	66.7056

## Sheet: BoHV4 BrdU CnAOEC
	DH82 CTR	DH82 CTR	DH82 CTR	DH82 BoHV4	DH82 BoHV4	DH82 BoHV4	D17 CTR	D17 CTR	D17 CTR	D17 BoHV4	D17 BoHV4	D17 BoHV4	OSA2 CTR	OSA2 CTR	OSA2 CTR	OSA2 BoHV4	OSA2 BoHV4	OSA2 BoHV4
48h	0.952	0.823	0.888	0.844	0.915	0.843	0.907	0.8	0.712	0.721	0.775	0.781	1.438	1.268	1.2	0.664	0.803	1.067
96h	1.213	1.184	1.089	0.728	0.841	0.846	0.841	0.903	0.834	0.729	0.708	0.73	1.274	0.865	0.875	0.942	1.261	1.187

## Sheet: BoHV1 BrdU CnAOEC 
	DH82 CTR	DH82 CTR	DH82 CTR	DH82 BoHV1	DH82 BoHV1	DH82 BoHV1	D17 CTR	D17 CTR	D17 CTR	D17 BoHV1	D17 BoHV1	D17 BoHV1	OSA2 CTR	OSA2 CTR	OSA2 CTR	OSA2 BoHV1	OSA2 BoHV1	OSA2 BoHV1
48h	0.952	0.823	0.888	0.938	0.939	1.04	0.907	0.8	0.712	0.732	0.736	0.784	1.438	1.268	1.2	0.938	0.951	0.82
96h	1.213	1.184	1.089	0.179	0.174	0.18	0.841	0.903	0.834	0.949	0.773	0.7	1.274	0.865	0.875	0.739	0.779	0.892
